# Supplementary figures and images for: Inferring the destabilization susceptibility of mountain permafrostin the French Alps using an inventory of destabilized rock glaciers
Source: Copernicus journal article supplement (doi:10.5194/tc-2018-97), 2018-06-13

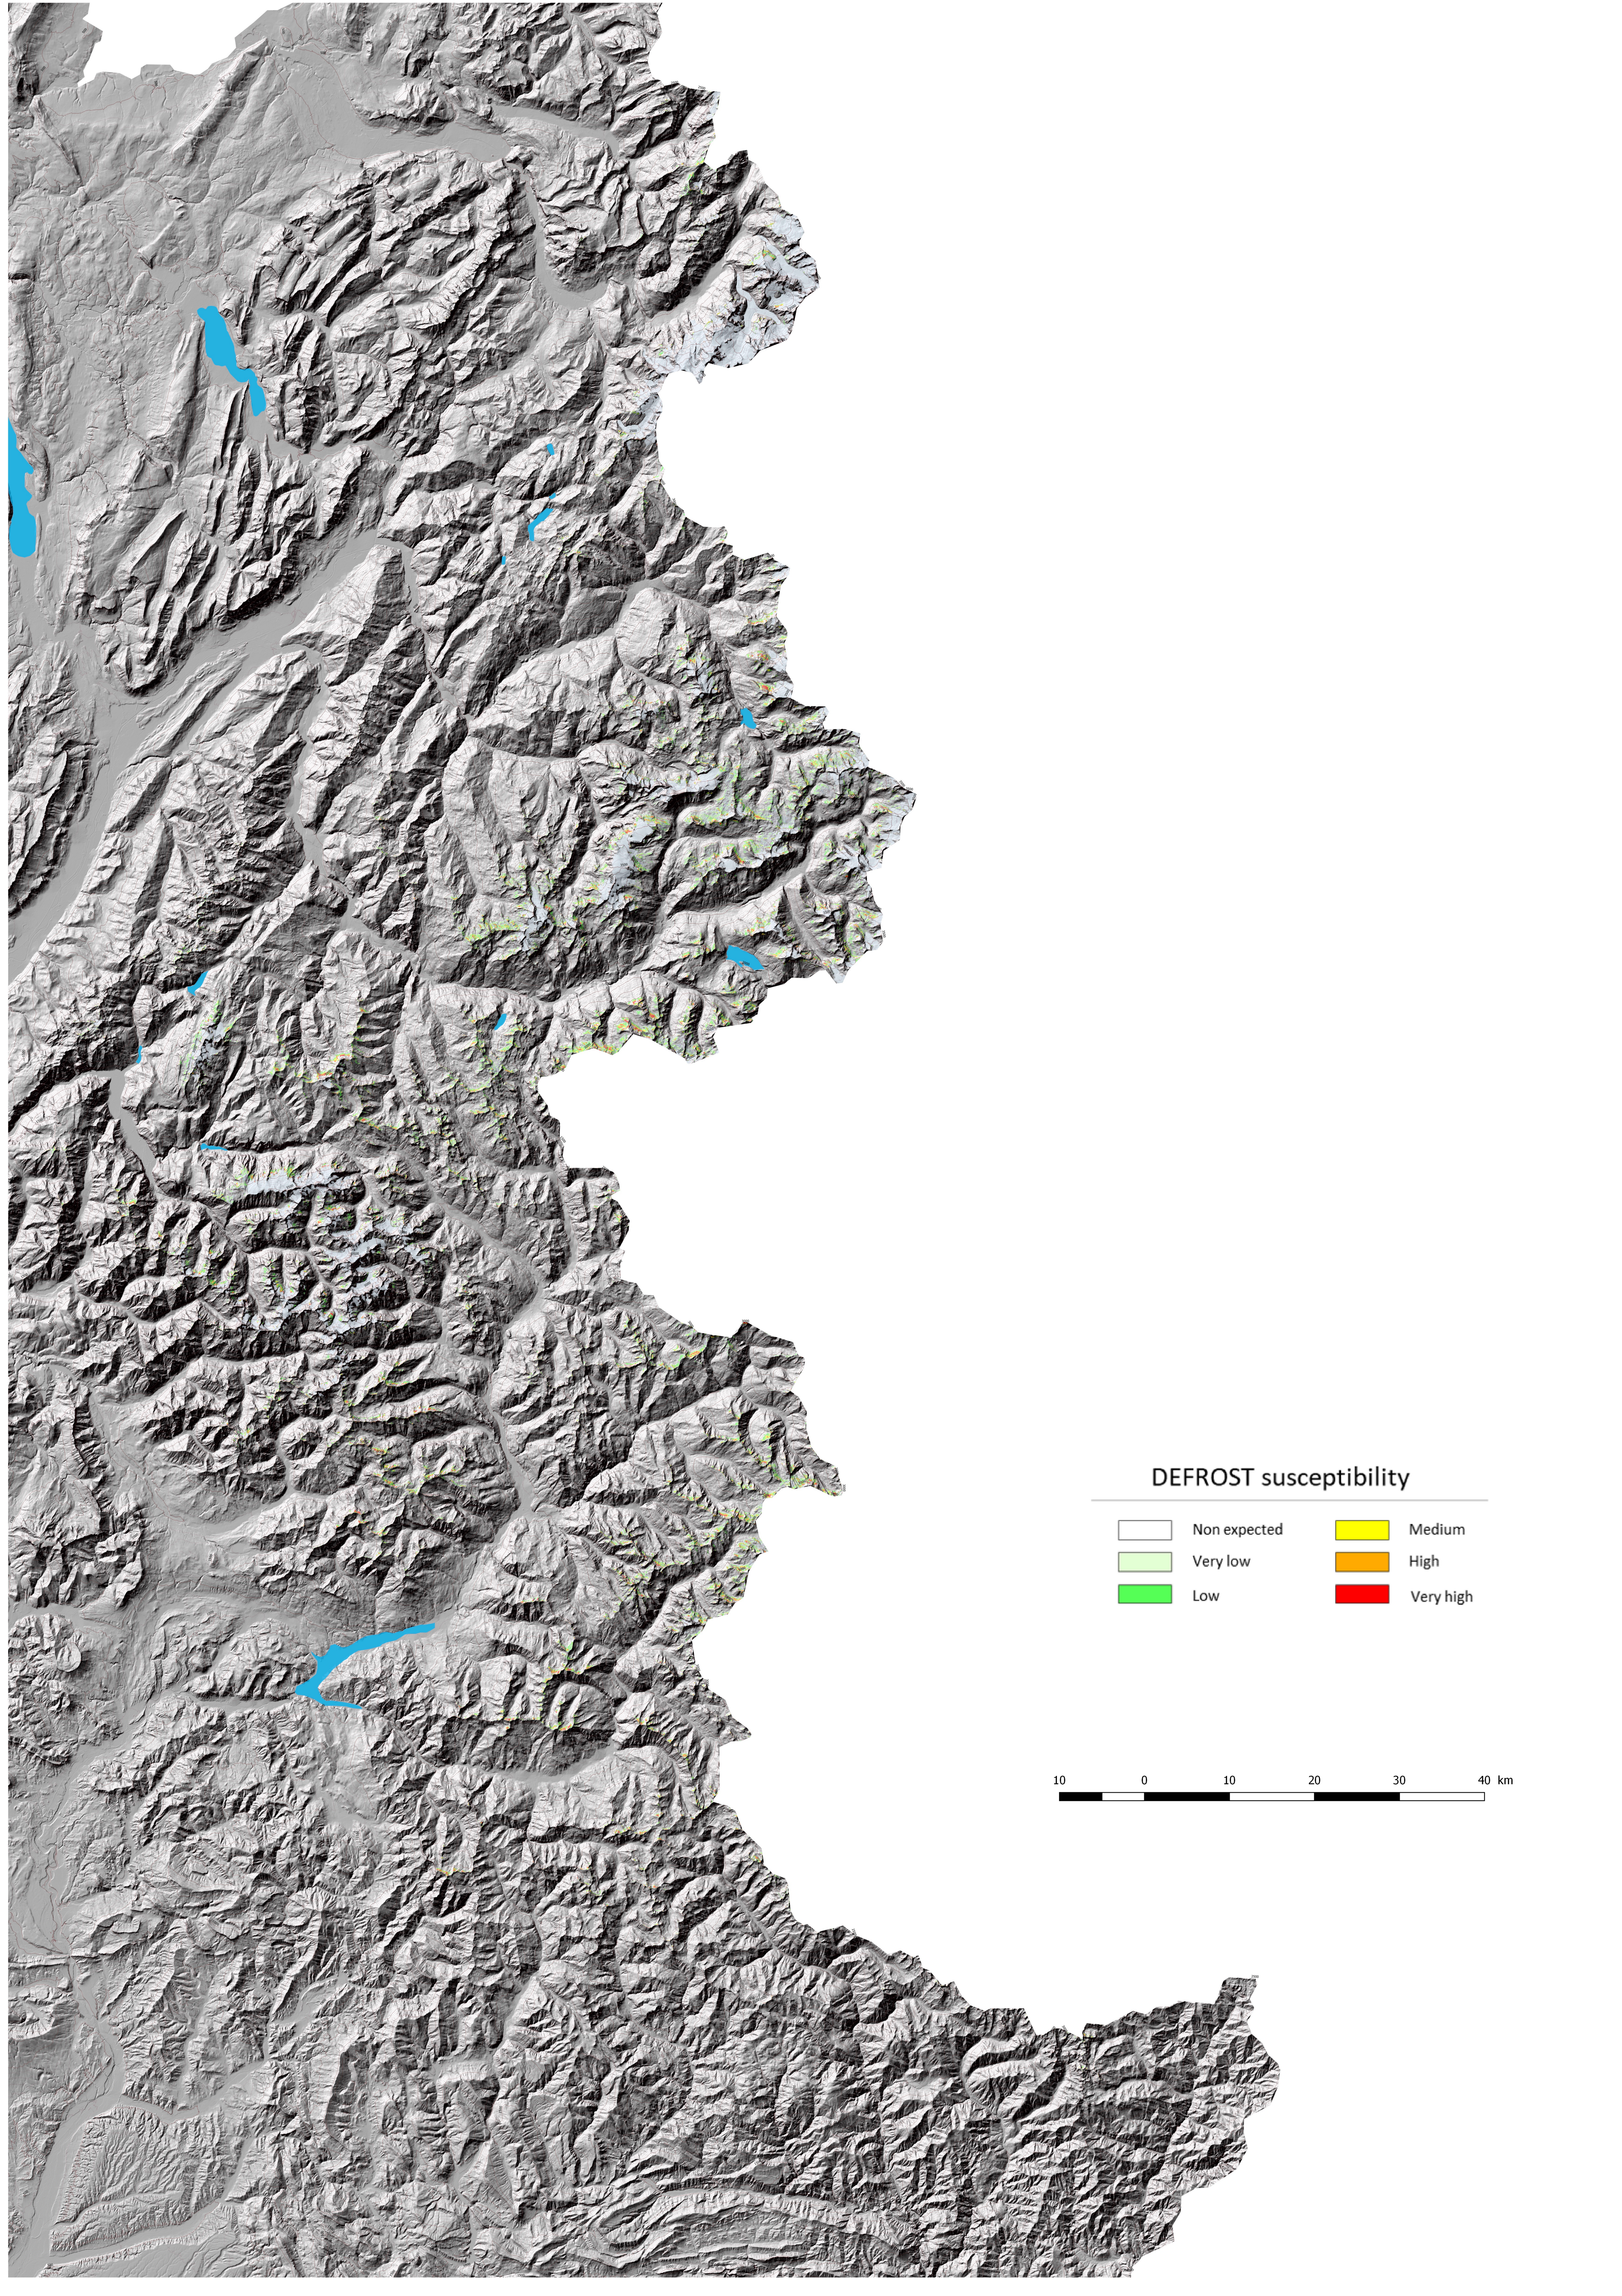

DEFROST susceptibility

|              |           |
|--------------|-----------|
| Non expected | Medium    |
| Very low     | High      |
| Low          | Very high |

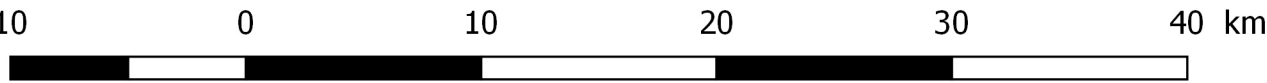

Supplement: Supplementary file 1 [file DEFROST.pdf › supplementary_materials/DEFROST.pdf]
